# Supplementary material for: Enhanced p-nitrophenol removal in a membrane-free bio-contact coupled bioelectrochemical system
Source: Royal Society of Chemistry journal article supplement (doi:10.1039/c4ra17218c), 2015-01-01
Supplement: c4ra17218c1.pdf [file c4ra17218c1.pdf]

**Supporting Information**

**For**

**Enhanced *p*-nitrophenol removal in a membrane-free bio-contact coupled  
bioelectrochemical system**

Shuai Lou<sup>1</sup>, Xinbai Jiang<sup>1</sup>, Dan Chen, Jinyou Shen<sup>\*</sup>, Weiqing Han, Xiuyun Sun,  
Jiansheng Li, Lianjun Wang<sup>\*\*</sup>

*Jiangsu Key Laboratory for Chemical Pollution Control and Resources Reuse, School  
of Environmental and Biological Engineering, Nanjing University of Science and  
Technology, Nanjing 210094, Jiangsu Province, China*

Corresponding author: <sup>\*</sup>Jinyou Shen, Tel./Fax: +86 25 84303965, E-mail address:  
shenjinyou@mail.njust.edu.cn; <sup>\*\*</sup>Lianjun Wang, Tel./Fax: +86 25 84315941, E-mail  
address: wanglj@mail.njust.edu.cn

<sup>1</sup>These authors contributed to the paper equally.

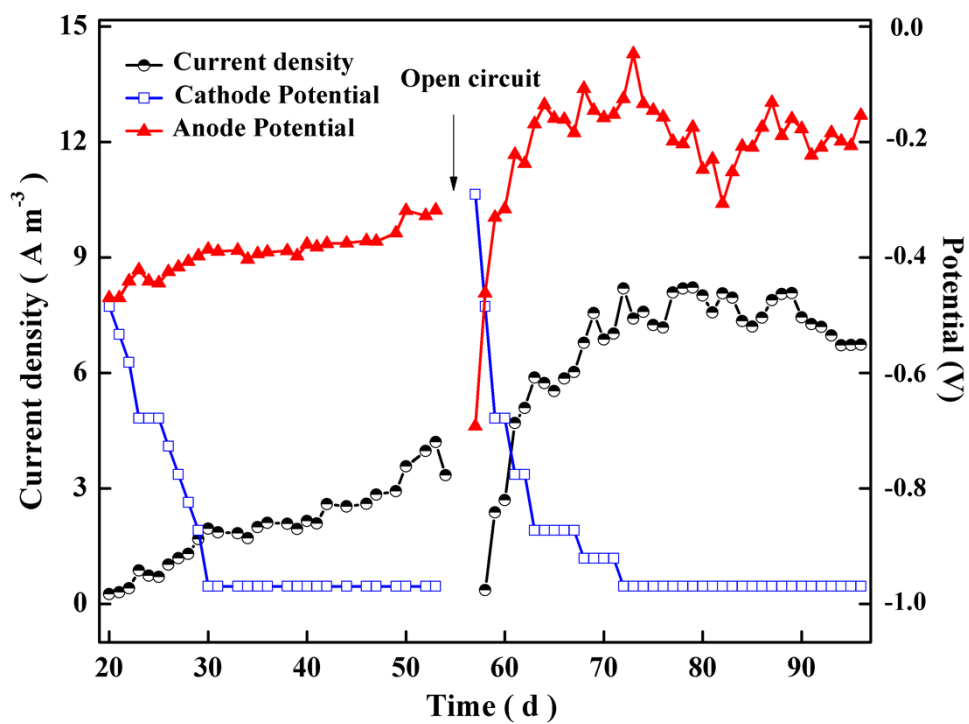

**Fig. S1** Anode potential, cathode potential and current density in BC-BES.

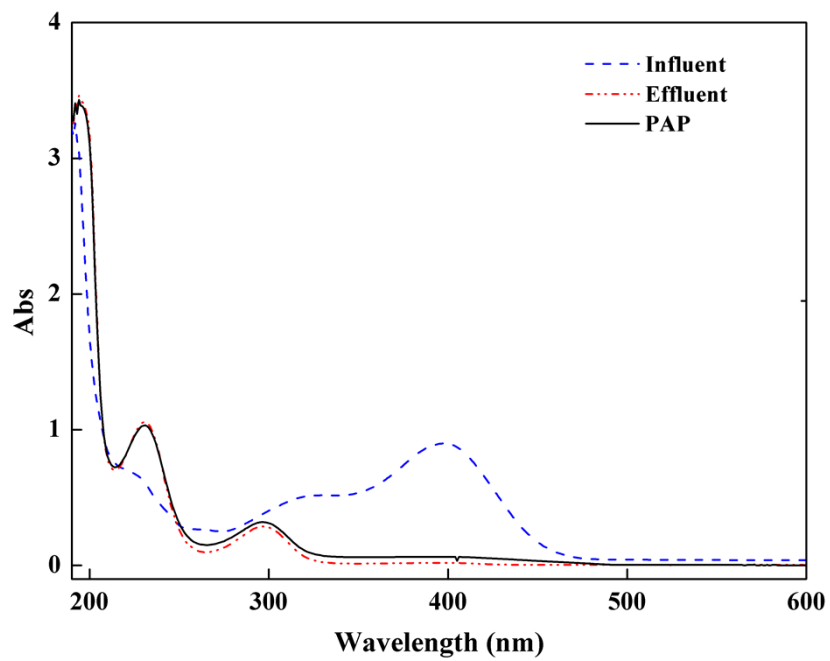

**Fig. S2** Evolution of UV-vis spectra for PNP reduction and PAP formation in BC-BES.

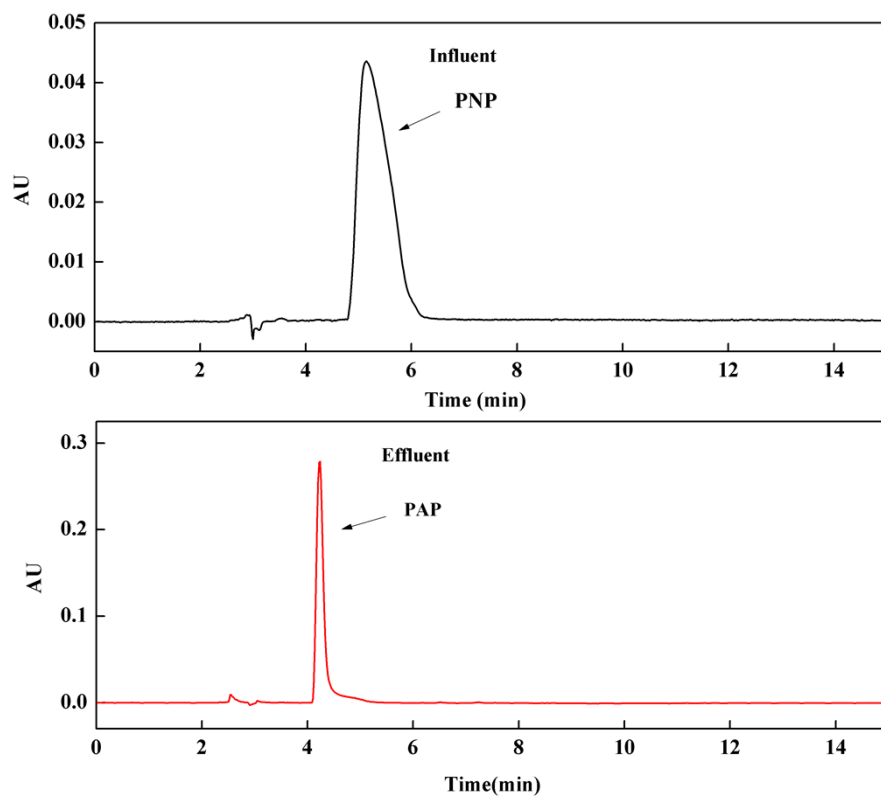

**Fig. S3** HPLC chromatogram for PNP reduction and PAP formation in BC-BES.

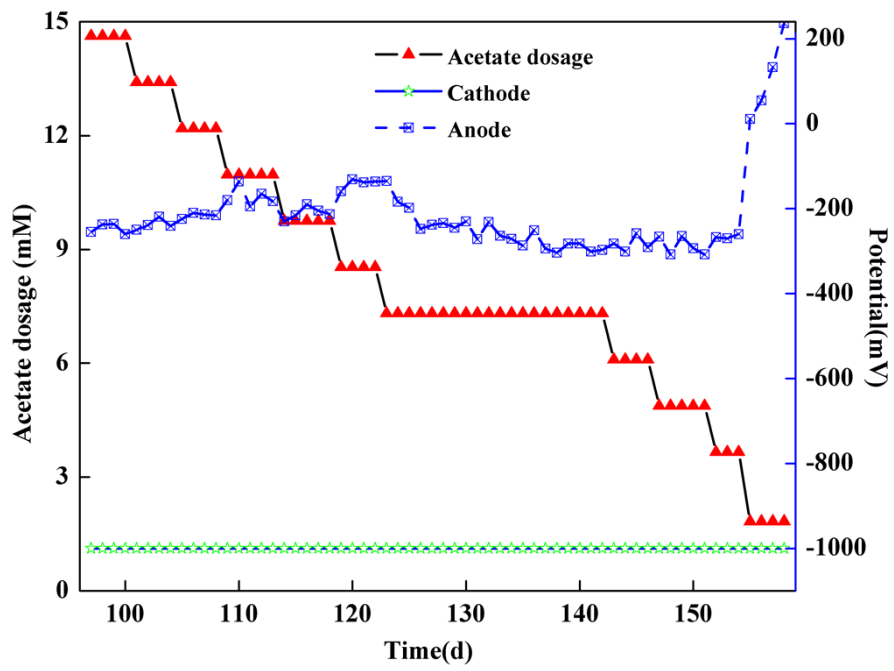

**Fig. S4** Anode and cathode potential at various acetate dosages in BC-BES.
